# Supplementary material
Source: HighWire-hosted journal article supplement (https://cmaj.ca/highwire/filestream/59596/field_highwire_adjunct_files/9/150771-res-Appendix_8.pdf)
Supplement: 150771-res-Appendix_8.pdf [file 150771-res-Appendix_8.pdf]

**Appendix 8 (as supplied by the authors): Subgroup analysis of Risk of Cardiovascular Death Among Patients Using ARBs and ACEIs**

| <b>Characteristic</b>                   | <b>Hazard Ratio*<br/>(95% CI)</b> | <b>P Value</b> | <b>Interaction<br/>P Value</b> |
|-----------------------------------------|-----------------------------------|----------------|--------------------------------|
| <b>Gender</b>                           |                                   |                |                                |
| Male                                    | 1.009 (0.845-1.205)               | 0.9            | 0.9                            |
| Female                                  | 0.989 (0.798-1.225)               | 0.9            |                                |
| <b>Age</b>                              |                                   |                |                                |
| 20-64 years                             | 1.135 (0.946-1.361)               | 0.2            | 0.04                           |
| ≥ 65 years                              | 0.854 (0.694-1.051)               | 0.1            |                                |
| <b>Charlson Comorbidity Index score</b> |                                   |                |                                |
| 2                                       | 1.229 (0.923-1.635)               | 0.2            | 0.1                            |
| 3                                       | 0.769 (0.558-1.060)               | 0.1            |                                |
| 4                                       | 0.869 (0.619-1.220)               | 0.4            |                                |
| ≥ 5                                     | 1.081 (0.877-1.334)               | 0.5            |                                |
| <b>Hypertension</b>                     |                                   |                |                                |
| Yes                                     | 0.988 (0.858-1.138)               | 0.9            | 0.3                            |
| No                                      | 1.315 (0.771-2.241)               | 0.3            |                                |
| <b>Chronic kidney disease</b>           |                                   |                |                                |
| Yes                                     | 1.083 (0.841-1.396)               | 0.5            | 0.5                            |
| No                                      | 0.979 (0.833-1.152)               | 0.8            |                                |
| <b>Heart failure</b>                    |                                   |                |                                |
| Yes                                     | 1.045 (0.774-1.411)               | 0.8            | 0.8                            |
| No                                      | 0.995 (0.853-1.160)               | 0.9            |                                |
| <b>Coronary artery disease</b>          |                                   |                |                                |
| Yes                                     | 1.052 (0.838-1.321)               | 0.7            | 0.6                            |
| No                                      | 0.982 (0.828-1.165)               | 0.8            |                                |

\* Adjusted for propensity score; ACEI cohort: reference group

Abbreviations: CI, confidence interval; ARBs, Angiotensin II receptor blockers; ACEIs, angiotensin-converting-enzyme inhibitors; RAAS, Renin-angiotensin-aldosterone system.
